# Supplementary material
Source: PubMed Central journal article supplement (PMC9780172)
Supplement: NIHMS1852885-supplement-1.pdf [file NIHMS1852885-supplement-1.pdf]

Supplementary Figure. Intervention Messages

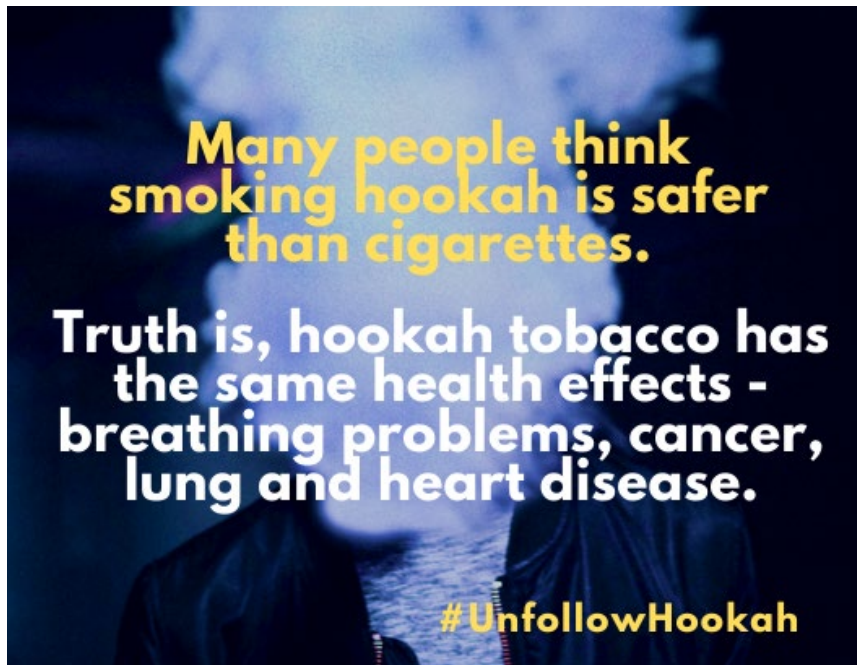

**Many people think smoking hookah is safer than cigarettes.**

**Truth is, hookah tobacco has the same health effects - breathing problems, cancer, lung and heart disease.**

**#UnfollowHookah**



**Consider skipping your turn.**

**Sharing a hookah hose increases your risk of infections like herpes.**

**#UnfollowHookah**



**Don't let flavored hookah tobacco smooth talk you.**

**Flavored hookah tobacco masks the nasty chemicals and is manufactured the same way as cigarettes.**

**#UnfollowHookah**



**No one is invincible.**

**Even smoking hookah just once or twice a month can lead to nicotine addiction.**

**#UnfollowHookah**
